# Supplementary material
Source: PubMed Central journal article supplement (PMC4527329)
Supplement: NIHMS524591-supplement-SupplTable1.pdf [file NIHMS524591-supplement-SupplTable1.pdf]

**Supplemental Table 1 Clinical features of subjects included in the MSG biopsy**

| <b>Subjects</b> | <b>Age at Biopsy</b> | <b>Focus Score</b> | <b>Ocular involvement</b> | <b>Salivary Flow</b> | <b>Autoantibodies</b> |
|-----------------|----------------------|--------------------|---------------------------|----------------------|-----------------------|
| HV              | 44                   | 0                  | N                         | Normal               | Negative              |
| HV              | 30                   | 0                  | N                         | Normal               | Negative              |
| HV              | 37                   | 0                  | N                         | Normal               | Negative              |
| HV              | 53                   | 0                  | N                         | Low                  | Negative              |
| HV              | 34                   | 0                  | Y                         | Low                  | Negative              |
| HV              | 54                   | 0                  | N                         | Normal               | Negative              |
| pSS             | 58                   | 2                  | Y                         | Low                  | Positive              |
| pSS             | 42                   | 1                  | Y                         | Low                  | Positive              |
| pSS             | 31                   | 2                  | N                         | Low                  | Positive              |
| pSS             | 62                   | 2                  | Y                         | Low                  | Positive              |
| pSS             | 60                   | 2                  | Y                         | Low                  | Positive              |

Criteria are based on the American European consensus group. Ocular involvement was determined by an abnormal Schirmer-1 test and/or increase conjunctival staining score. Abnormal salivary flow rate was defined as unstimulated salivary flow  $\leq 1.5$  ml/15 mins. Autoantibody positivity was defined as the presence of anti-nuclear antibodies or anti-Ro/SSA and anti-La/SSB antibodies.
