# Supplementary material
Source: PubMed Central journal article supplement (PMC4527329)
Supplement: NIHMS524591-supplement-SupplTable2.pdf [file NIHMS524591-supplement-SupplTable2.pdf]

**Supplemental table 2 Transcriptome study detected all changed genes in MSG from pSS patients**

| Fold Change | Gene Symbol | Gene Name                                                                                                                                    | Accession    | UniGeneID |
|-------------|-------------|----------------------------------------------------------------------------------------------------------------------------------------------|--------------|-----------|
| -2.370222   | RPRM        | represso, TP53 dependent G2 arrest mediator candidate                                                                                        | NM_019845    | Hs.100890 |
| -3.0553844  | COPE        | coatamer protein complex, subunit epsilon                                                                                                    | NM_199444    | Hs.10326  |
| -4.5725937  | SLC1A7      | solute carrier family 1 (glutamate transporter), member 7                                                                                    | NM_006671    | Hs.104637 |
| -2.4943898  | SRPK3       | SFRS protein kinase 3                                                                                                                        | NM_014370    | Hs.104865 |
| 3.312211    | SERPINB9    | serpin peptidase inhibitor, clade B (ovalbumin), member 9<br>granzyme B (granzyme 2, cytotoxic T-lymphocyte-associated<br>serine esterase 1) | NM_004155    | Hs.104879 |
| 2.2928283   | GZMB        | serine esterase 1)                                                                                                                           | NM_004131    | Hs.1051   |
| -2.2832513  | NPDC1       | neural proliferation, differentiation and control, 1                                                                                         | NM_015392    | Hs.105547 |
| 2.4865181   | C1orf38     | chromosome 1 open reading frame 38                                                                                                           | BC031655     | Hs.10649  |
| 2.1609387   | TMEM70      | transmembrane protein 70                                                                                                                     | NM_001040613 | Hs.106650 |
| -2.3641164  | APH1A       | anterior pharynx defective 1 homolog A ( <i>C. elegans</i> )                                                                                 | NM_016022    | Hs.108408 |
| -2.0847275  | ALOX15B     | arachidonate 15-lipoxygenase, type B                                                                                                         | NM_001141    | Hs.111256 |
| 2.4934502   | P2RY8       | purinergic receptor P2Y, G-protein coupled, 8                                                                                                | NM_178129    | Hs.111377 |
| 2.1300533   | PIF1        | PIF1 5'-to-3' DNA helicase homolog ( <i>S. cerevisiae</i> )                                                                                  | NM_025049    | Hs.112160 |
| 2.4639466   | VAV1        | vav 1 guanine nucleotide exchange factor                                                                                                     | NM_005428    | Hs.116237 |
| 2.665251    | MEI1        | meiosis inhibitor 1                                                                                                                          | NM_152513    | Hs.116419 |
| 2.9839902   | BST2        | bone marrow stromal cell antigen 2                                                                                                           | NM_004335    | Hs.118110 |
| 2.144227    | MGC24039    | hypothetical protein MGC24039<br>Human glucocorticoid receptor alpha mRNA, variant 3' UTR.<br>[U25029]                                       | NM_144973    | Hs.118166 |
| 2.424866    | NR3C1       | [U25029]                                                                                                                                     | U25029       | Hs.122926 |
| 2.1521337   | CLIP4       | CAP-GLY domain containing linker protein family, member 4                                                                                    | NM_024692    | Hs.122927 |
| -5.984112   | KLK1        | kallikrein 1                                                                                                                                 | NM_002257    | Hs.123107 |
| 2.1823227   | SPAG4       | sperm associated antigen 4<br>BX118285 Soares_testis_NHT Homo sapiens cDNA clone                                                             | NM_003116    | Hs.123159 |
| -5.2182856  |             | IMAGp998G173521, mRNA sequence [BX118285]                                                                                                    | BX118285     | Hs.124007 |
| 3.3104491   | LRMP        | lymphoid-restricted membrane protein                                                                                                         | NM_006152    | Hs.124922 |
| 2.0415797   | RASGEF1A    | RasGEF domain family, member 1A                                                                                                              | BC022548     | Hs.125293 |
| 2.3145926   | VPS4B       | vacuolar protein sorting 4 homolog B ( <i>S. cerevisiae</i> )                                                                                | NM_004869    | Hs.126550 |

|            |          |                                                                                                                                             |              |           |
|------------|----------|---------------------------------------------------------------------------------------------------------------------------------------------|--------------|-----------|
| 2.1315243  | FAM49B   | family with sequence similarity 49, member B                                                                                                | NM_016623    | Hs.126941 |
| 2.004701   | BIRC3    | baculoviral IAP repeat-containing 3                                                                                                         | NM_001165    | Hs.127799 |
| 2.4122024  | TIPARP   | TCDD-inducible poly(ADP-ribose) polymerase                                                                                                  | NM_015508    | Hs.12813  |
| -2.0089054 | BAIAP2   | BAI1-associated protein 2                                                                                                                   | NM_006340    | Hs.128316 |
| -2.2017336 | ATP13A2  | ATPase type 13A2                                                                                                                            | NM_022089    | Hs.128866 |
| 2.8453515  | PLSCR1   | phospholipid scramblase 1                                                                                                                   | NM_021105    | Hs.130759 |
| 2.1958406  | GLCCI1   | glucocorticoid induced transcript 1                                                                                                         | NM_138426    | Hs.131673 |
| 2.042574   | NRP1     | neuropilin 1                                                                                                                                | NM_003873    | Hs.131704 |
| 2.0760622  | IL27RA   | interleukin 27 receptor, alpha                                                                                                              | NM_004843    | Hs.132781 |
| -2.1064475 | ZNF358   | zinc finger protein 358                                                                                                                     | NM_018083    | Hs.133475 |
| -2.5286887 | HSD11B2  | hydroxysteroid (11-beta) dehydrogenase 2                                                                                                    | NM_000196    | Hs.1376   |
| -2.0834153 | KIAA1602 | KIAA1602                                                                                                                                    | NM_020941    | Hs.143067 |
| -2.1248786 | STAC2    | SH3 and cysteine rich domain 2                                                                                                              | NM_198993    | Hs.145068 |
| 2.2438252  | HCLS1    | hematopoietic cell-specific Lyn substrate 1<br>602638586F1 NIH_MGC_48 Homo sapiens cDNA clone<br>IMAGE:4766349 5', mRNA sequence [BG686022] | NM_005335    | Hs.14601  |
| 2.1025002  |          |                                                                                                                                             | BG686022     | Hs.147381 |
| 3.1446164  | TRAF3IP3 | TRAF3 interacting protein 3                                                                                                                 | NM_025228    | Hs.147434 |
| 2.7225304  | BCL2     | B-cell CLL/lymphoma 2                                                                                                                       | NM_000633    | Hs.150749 |
| 2.427278   | CKLF     | chemokine-like factor                                                                                                                       | NM_181641    | Hs.15159  |
| 2.606552   | DOK3     | docking protein 3                                                                                                                           | AK097258     | Hs.153343 |
| -2.724691  | LYNX1    | Ly6/neurotoxin 1                                                                                                                            | NM_177457    | Hs.158665 |
| -2.0737333 | P53AIP1  | p53-regulated apoptosis-inducing protein 1                                                                                                  | AB045831     | Hs.160953 |
| -2.3331923 | SLC26A9  | solute carrier family 26, member 9                                                                                                          | NM_052934    | Hs.164073 |
| 2.2896628  | RUNX3    | runt-related transcription factor 3                                                                                                         | NM_001031680 | Hs.170019 |
| 2.0574248  | FAIM     | Fas apoptotic inhibitory molecule<br>proteasome (prosome, macropain) subunit, beta type, 8 (large<br>multifunctional peptidase 7)           | NM_001033030 | Hs.173438 |
| 3.9002724  | PSMB8    |                                                                                                                                             | NM_004159    | Hs.180062 |
| 2.1511083  | ZNF550   | zinc finger protein 550                                                                                                                     | BC053858     | Hs.180257 |
| 2.915729   | HLA-A    | major histocompatibility complex, class I, A                                                                                                | NM_002116    | Hs.181244 |
| 2.9087708  | CTSS     | cathepsin S                                                                                                                                 | NM_004079    | Hs.181301 |
| 2.5715904  | DDX58    | DEAD (Asp-Glu-Ala-Asp) box polypeptide 58                                                                                                   | NM_014314    | Hs.190622 |

|            |          |                                                                            |              |           |
|------------|----------|----------------------------------------------------------------------------|--------------|-----------|
| 5.056217   | SRGN     | serglycin                                                                  | NM_002727    | Hs.1908   |
| 2.0091524  | VPS13B   | vacuolar protein sorting 13 homolog B (yeast)                              | NM_017890    | Hs.191540 |
| 2.3578775  | WDR82    | WD repeat domain 82                                                        | NM_025222    | Hs.194110 |
| -2.349492  | SRC      | v-src sarcoma (Schmidt-Ruppin A-2) viral oncogene homolog (avian)          | NM_005417    | Hs.195659 |
| 3.0791373  | IFIT1    | interferon-induced protein with tetratricopeptide repeats 1                | NM_001548    | Hs.20315  |
| 2.0829208  | ST6GAL1  | ST6 beta-galactosamide alpha-2,6-sialyltransferase 1                       | NM_173216    | Hs.207459 |
| 2.569959   | CD3G     | CD3g molecule, gamma (CD3-TCR complex)                                     | NM_000073    | Hs.2259   |
| -3.258197  | KIAA0664 | KIAA0664                                                                   | NM_015229    | Hs.22616  |
| 2.291807   | SUB1     | SUB1 homolog (S. cerevisiae)                                               | NM_006713    | Hs.229641 |
| 2.1479928  | CDKN1B   | cyclin-dependent kinase inhibitor 1B (p27, Kip1)                           | NM_004064    | Hs.238990 |
| -2.1441576 | MMP14    | matrix metalloproteinase 14 (membrane-inserted)                            | NM_004995    | Hs.2399   |
| 4.092508   | CD48     | CD48 molecule                                                              | NM_001778    | Hs.243564 |
| -3.353208  | MXRA7    | matrix-remodelling associated 7                                            | NM_001008529 | Hs.250723 |
| 2.871697   | IFIT5    | interferon-induced protein with tetratricopeptide repeats 5                | NM_012420    | Hs.252839 |
| 2.0871336  | MSMB     | microseminoprotein, beta-                                                  | NM_002443    | Hs.255462 |
| 2.7046626  | TNFRSF17 | tumor necrosis factor receptor superfamily, member 17                      | NM_001192    | Hs.2556   |
| -3.4028559 | RORC     | RAR-related orphan receptor C                                              | NM_005060    | Hs.256022 |
| 2.1276748  | E2F3     | E2F transcription factor 3                                                 | NM_001949    | Hs.269408 |
| -2.13133   | OTUD4    | OTU domain containing 4                                                    | NM_199324    | Hs.270851 |
| 2.0828018  | TBX21    | T-box 21                                                                   | NM_013351    | Hs.272409 |
| 3.5566504  | CD52     | CD52 molecule                                                              | NM_001803    | Hs.276770 |
| 2.2524126  | MGAT3    | mannosyl (beta-1,4-)-glycoprotein beta-1,4-N-acetylglucosaminyltransferase | NM_002409    | Hs.276808 |
| -2.5980015 | ALMS1P   | Alstrom syndrome 1 pseudogene                                              | NR_003683    | Hs.278983 |
| -2.2032354 | WIF1     | WNT inhibitory factor 1                                                    | NM_007191    | Hs.284122 |
| 4.074837   | BMP6     | bone morphogenetic protein 6                                               | NM_001718    | Hs.285671 |
| 2.325591   | WDFY4    | WDFY family member 4                                                       | BC032420     | Hs.287379 |
| 2.9968987  | 6ST      | B cell RAG associated protein                                              | NM_015892    | Hs.287537 |
| -2.1325843 | ARID1B   | AT rich interactive domain 1B (SWI1-like)                                  | NM_175863    | Hs.291587 |

|            |          |                                                                   |              |           |
|------------|----------|-------------------------------------------------------------------|--------------|-----------|
|            |          | matrix metalloproteinase 9 (gelatinase B, 92kDa gelatinase, 92kDa |              |           |
| 4.1655855  | MMP9     | type IV collagenase)                                              | NM_004994    | Hs.297413 |
| -2.3850489 | AQP5     | Aquaporin 5                                                       | NM_001651    | Hs.298023 |
| 2.0259647  | KNTC1    | kinetochore associated 1                                          | NM_014708    | Hs.300559 |
| 3.0242934  | CCR1     | chemokine (C-C motif) receptor 1                                  | NM_001295    | Hs.301921 |
| 3.9095469  | ZBP1     | Z-DNA binding protein 1                                           | NM_030776    | Hs.302123 |
| 2.342615   | CCL2     | chemokine (C-C motif) ligand 2                                    | NM_002982    | Hs.303649 |
| 2.1040733  | CUGBP2   | CUG triplet repeat, RNA binding protein 2                         | NM_001025077 | Hs.309288 |
| -2.0971637 | SHC2     | SHC (Src homology 2 domain containing) transforming protein 2     | NM_012435    | Hs.30965  |
|            |          | amyloid beta (A4) precursor protein-binding, family B, member 1   |              |           |
| 2.3252513  | APBB1IP  | interacting protein                                               | NM_019043    | Hs.310421 |
| -2.1142938 | ADAM15   | ADAM metalloproteinase domain 15                                  | NM_207191    | Hs.312098 |
| -2.3909447 | YIPF2    | Yip1 domain family, member 2                                      | NM_024029    | Hs.323213 |
| -2.161816  | YIPF2    | Yip1 domain family, member 2                                      | NM_024029    | Hs.323213 |
| 3.3068666  | F13A1    | coagulation factor XIII, A1 polypeptide                           | NM_000129    | Hs.335513 |
|            |          | solute carrier family 16, member 11 (monocarboxylic acid          |              |           |
| -2.0685341 | SLC16A11 | transporter 11)                                                   | NM_153357    | Hs.336564 |
| 2.0837245  | CD58     | CD58 molecule                                                     | NM_001779    | Hs.34341  |
| 2.4729555  | GZMH     | granzyme H (cathepsin G-like 2, protein h-CCPX)                   | NM_033423    | Hs.348264 |
| 2.4237432  | TAP1     | transporter 1, ATP-binding cassette, sub-family B (MDR/TAP)       | NM_000593    | Hs.352018 |
| 2.2882926  | STCH     | stress 70 protein chaperone, microsomal-associated, 60kDa         | NM_006948    | Hs.352341 |
| 3.5055525  | CD27     | CD27 molecule                                                     | NM_001242    | Hs.355307 |
| 2.1023312  | FAM46C   | family with sequence similarity 46, member C                      | NM_017709    | Hs.356216 |
| 2.3316221  | ORAI2    | ORAI calcium release-activated calcium modulator 2                | NM_032831    | Hs.363308 |
| -2.5862727 | U2AF1    | U2 small nuclear RNA auxiliary factor 1                           | NM_001025204 | Hs.365116 |
| -2.3780384 | PYGB     | phosphorylase, glycogen; brain                                    | NM_002862    | Hs.368157 |
|            |          | sphingomyelin phosphodiesterase 3, neutral membrane (neutral      |              |           |
| 2.0549204  | SMPD3    | sphingomyelinase II)                                              | NM_018667    | Hs.368421 |
| 2.0613952  | NAT5     | N-acetyltransferase 5                                             | NM_016100    | Hs.368783 |
| -2.7009687 | FBN3     | fibrillin 3                                                       | NM_032447    | Hs.370362 |
| -2.1106164 | SLC22A17 | solute carrier family 22, member 17                               | NM_016609    | Hs.373498 |

|            |           |                                                                                                                  |             |           |
|------------|-----------|------------------------------------------------------------------------------------------------------------------|-------------|-----------|
|            |           | integrin, beta 2 (complement component 3 receptor 3 and 4 subunit)                                               | NM_000211   | Hs.375957 |
| 2.3104155  | ITGB2     |                                                                                                                  |             |           |
| 2.3698251  | BTN3A2    | butyrophilin, subfamily 3, member A2                                                                             | NM_007047   | Hs.376046 |
| -2.0066192 | RAB26     | RAB26, member RAS oncogene family                                                                                | NM_014353   | Hs.3797   |
| 2.1838546  | USP18     | ubiquitin specific peptidase 18                                                                                  | NM_017414   | Hs.38260  |
| 2.7202845  | FAM89A    | family with sequence similarity 89, member A                                                                     | NM_198552   | Hs.38516  |
| 2.2562208  | CFLAR     | CASP8 and FADD-like apoptosis regulator                                                                          | AF009616    | Hs.390736 |
| -2.929926  | IL17RE    | interleukin 17 receptor E                                                                                        | NM_153483   | Hs.390823 |
| 2.019835   | C13orf27  | chromosome 13 open reading frame 27                                                                              | NM_138779   | Hs.398111 |
| 2.1224394  | CD109     | CD109 molecule                                                                                                   | NM_133493   | Hs.399891 |
| -3.1009145 | LOC388796 | hypothetical LOC388796                                                                                           | BX640887    | Hs.400876 |
| 2.204119   | CTHRC1    | collagen triple helix repeat containing 1                                                                        | NM_138455   | Hs.405614 |
| -2.062311  | CREB3L1   | cAMP responsive element binding protein 3-like 1                                                                 | NM_052854   | Hs.405961 |
|            |           | sema domain, immunoglobulin domain (Ig), transmembrane domain (TM) and short cytoplasmic domain, (semaphorin) 4A |             |           |
| -3.0851607 | SEMA4A    |                                                                                                                  | NM_022367   | Hs.408846 |
| 2.3627517  | SULF1     | sulfatase 1                                                                                                      | NM_015170   | Hs.409602 |
| 2.090799   | PLCG2     | phospholipase C, gamma 2 (phosphatidylinositol-specific)                                                         | NM_002661   | Hs.413111 |
| 2.26403    | RGS16     | regulator of G-protein signaling 16                                                                              | NM_002928   | Hs.413297 |
| 2.0045002  | ICAM2     | intercellular adhesion molecule 2                                                                                | NM_000873   | Hs.431460 |
| -4.8788013 | GGT7      | gamma-glutamyltransferase 7                                                                                      | NM_178026   | Hs.433738 |
| 3.104471   | RTP4      | receptor (chemosensory) transporter protein 4                                                                    | NM_022147   | Hs.43388  |
| -2.1969962 | APP       | amyloid beta (A4) precursor protein                                                                              | NM_000484.2 | Hs.434980 |
| -2.1932604 | LOC441376 | AARD protein                                                                                                     | BC142621    | Hs.437551 |
|            |           | cartilage intermediate layer protein, nucleotide pyrophosphohydrolase                                            |             |           |
| 3.4874353  | CILP      |                                                                                                                  | NM_003613   | Hs.442180 |
| 2.654957   | IRS2      | insulin receptor substrate 2                                                                                     | NM_003749   | Hs.442344 |
| -2.051888  | MED13L    | mediator complex subunit 13-like                                                                                 | AK025280    | Hs.444483 |
|            |           | BOLA2_HUMAN (Q9H3K6) BOLA-like protein 2, partial (33%) [THC2674691]                                             |             |           |
| 2.0174851  | Bola2     |                                                                                                                  | THC2674691  | Hs.444600 |
| 2.0029702  | TRIB1     | tribbles homolog 1 (Drosophila)                                                                                  | NM_025195   | Hs.444947 |
| 4.6028957  | UBD       | ubiquitin D                                                                                                      | NM_006398   | Hs.44532  |

|            |           |                                                                                                                        |              |           |
|------------|-----------|------------------------------------------------------------------------------------------------------------------------|--------------|-----------|
| 2.3521588  | CARD8     | caspase recruitment domain family, member 8                                                                            | NM_014959    | Hs.446146 |
| -2.4365416 | PFDN6     | prefoldin subunit 6                                                                                                    | NM_014260    | Hs.446374 |
| 2.6640038  | CD47      | CD47 molecule                                                                                                          | NM_198793    | Hs.446414 |
| -2.0658374 | LDOC1     | leucine zipper, down-regulated in cancer 1                                                                             | NM_012317    | Hs.45231  |
| 2.8852723  | IFITM1    | interferon induced transmembrane protein 1 (9-27)                                                                      | NM_003641    | Hs.458414 |
| 4.215774   |           |                                                                                                                        | AJ004954     | Hs.458446 |
| 3.5176232  | ISG15     | ISG15 ubiquitin-like modifier                                                                                          | NM_005101    | Hs.458485 |
| 2.4000714  | IL16      | interleukin 16 (lymphocyte chemoattractant factor)                                                                     | NM_004513    | Hs.459095 |
| 2.2552216  | ISG20     | interferon stimulated exonuclease gene 20kDa                                                                           | NM_002201    | Hs.459265 |
| -2.0559795 | LRRC14    | leucine rich repeat containing 14                                                                                      | NM_014665    | Hs.459391 |
| 2.3756275  | ATF3      | activating transcription factor 3                                                                                      | NM_001040619 | Hs.460    |
|            |           | aldo-keto reductase family 1, member C1 (dihydrodiol dehydrogenase 1; 20-alpha (3-alpha)-hydroxysteroid dehydrogenase) |              |           |
| 2.0033886  | AKR1C1    |                                                                                                                        | NM_001353    | Hs.460260 |
| -2.2890286 | KIAA1576  | KIAA1576 protein                                                                                                       | NM_020927    | Hs.461405 |
| -4.1933794 | FKBP10    | FK506 binding protein 10, 65 kDa                                                                                       | NM_021939    | Hs.463035 |
| 2.3380435  | RHBDF2    | rhomboid 5 homolog 2 (Drosophila)                                                                                      | NM_024599    | Hs.464157 |
| 2.2404296  | NDUFV2    | NADH dehydrogenase (ubiquinone) flavoprotein 2, 24kDa<br>Homo sapiens cDNA FLJ40003 fis, clone STOMA2003716.           | NM_021074    | Hs.464572 |
| -2.0420103 | HNRMP     | [AK097322]                                                                                                             | AK097322     | Hs.465808 |
| 2.1137712  | PBX4      | pre-B-cell leukemia homeobox 4                                                                                         | NM_025245    | Hs.466257 |
| 2.1744914  | ODC1      | ornithine decarboxylase 1                                                                                              | NM_002539    | Hs.467701 |
| 2.1975563  | LCK       | lymphocyte-specific protein tyrosine kinase                                                                            | NM_005356    | Hs.470627 |
| 2.2319167  | PDK1      | pyruvate dehydrogenase kinase, isozyme 1                                                                               | NM_002610    | Hs.470633 |
| -2.8350713 | LOC339483 | hypothetical LOC339483                                                                                                 | BC041632     | Hs.471067 |
| -2.3086987 | CHMP4B    | chromatin modifying protein 4B                                                                                         | NM_176812    | Hs.472471 |
| 2.7534025  | STK4      | serine/threonine kinase 4                                                                                              | BC005231     | Hs.472838 |
| 2.2550151  | APOL3     | apolipoprotein L, 3                                                                                                    | NM_145641    | Hs.474737 |
| -2.2568762 | SEMA4B    | sema domain, immunoglobulin domain (Ig), transmembrane domain (TM) and short cytoplasmic domain, (semaphorin) 4B       | NM_020210    | Hs.474935 |
| 3.0413764  | EAF2      | ELL associated factor 2                                                                                                | NM_018456    | Hs.477325 |

|            |          |                                                                                                                 |              |           |
|------------|----------|-----------------------------------------------------------------------------------------------------------------|--------------|-----------|
| 2.9233494  | CD38     | CD38 molecule                                                                                                   | NM_001775    | Hs.479214 |
| 2.027279   | TBC1D9   | TBC1 domain family, member 9 (with GRAM domain)                                                                 | NM_015130    | Hs.480819 |
| -2.1519759 | TEAD3    | TEA domain family member 3                                                                                      | NM_003214    | Hs.485205 |
| 2.1649249  | SOD2     | superoxide dismutase 2, mitochondrial                                                                           | NM_001024465 | Hs.487046 |
| 2.0062041  | NT5C3    | 5'-nucleotidase, cytosolic III                                                                                  | NM_001002009 | Hs.487933 |
| 3.5682662  | SAMD9L   | sterile alpha motif domain containing 9-like                                                                    | NM_152703    | Hs.489118 |
| -7.277204  | LCE2D    | late cornified envelope 2D                                                                                      | NM_178430    | Hs.490225 |
| -2.5364416 | C9orf25  | chromosome 9 open reading frame 25                                                                              | NM_147202    | Hs.493771 |
| 2.4934716  | C9orf167 | chromosome 9 open reading frame 167                                                                             | NM_017723    | Hs.495541 |
| -2.73912   | LGR6     | leucine-rich repeat-containing G protein-coupled receptor 6                                                     | NM_001017403 | Hs.497402 |
| -2.1499434 | DNAJC7   | DnaJ (Hsp40) homolog, subfamily C, member 7                                                                     | NM_003315    | Hs.500156 |
| 2.1235607  | TRIM22   | tripartite motif-containing 22                                                                                  | NM_006074    | Hs.501778 |
| 2.1431508  | ZNF107   | zinc finger protein 107                                                                                         | NM_016220    | Hs.50216  |
| -2.408626  | RPLP0P2  | ribosomal protein, large, P0 pseudogene 2                                                                       | NR_002775    | Hs.502733 |
| 2.6765187  | IL10RA   | interleukin 10 receptor, alpha                                                                                  | NM_001558    | Hs.504035 |
| -2.1671872 | TRIM29   | tripartite motif-containing 29                                                                                  | NM_012101    | Hs.504115 |
| 2.3143744  | FLI1     | Friend leukemia virus integration 1                                                                             | NM_002017    | Hs.504281 |
| -2.469804  | PTMS     | parathymosin                                                                                                    | NM_002824    | Hs.504613 |
| 3.743957   | CD163    | CD163 molecule                                                                                                  | NM_004244    | Hs.504641 |
|            |          | endoplasmic reticulum-golgi intermediate compartment (ERGIC)                                                    |              |           |
| -2.0765502 | ERGIC1   | 1                                                                                                               | NM_001031711 | Hs.509163 |
| -2.3347747 | PBX2     | pre-B-cell leukemia homeobox 2                                                                                  | NM_002586    | Hs.509545 |
| 2.1146958  | BATF     | basic leucine zipper transcription factor, ATF-like                                                             | NM_006399    | Hs.509964 |
|            |          | Homo sapiens interferon, alpha-inducible protein 6, mRNA<br>(cDNA clone MGC:39273 IMAGE:5440834), complete cds. |              |           |
| 14.047259  | IFI6     | [BC024289]                                                                                                      | BC024289     | Hs.510635 |
| 11.759094  | IGH@     | immunoglobulin heavy locus                                                                                      | AK130614     | Hs.510635 |
| 13.404718  | IGHM     | immunoglobulin heavy constant mu                                                                                | BX161420     | Hs.510635 |
|            |          | Homo sapiens translocation associated fusion protein<br>IRTA1/IGA1 (IRTA1/IGHA1) mRNA, complete cds.            |              |           |
| 3.6053483  | IGHG1    | [AF343666]                                                                                                      | AF343666     | Hs.510635 |

|            |         |                                                                                                                          |                 |           |
|------------|---------|--------------------------------------------------------------------------------------------------------------------------|-----------------|-----------|
| 17.815155  | IGHG1   | Immunoglobulin heavy chain C gene segment<br>[Source:IMGT/GENE_DB;Acc:IGHG4] [ENST00000390543]                           | ENST00000390543 | Hs.510635 |
| 3.8300295  | IGHG1   | Immunoglobulin heavy chain V gene segment<br>[Source:IMGT/GENE_DB;Acc:IGHV1-2] [ENST00000390594]                         | ENST00000390594 | Hs.510635 |
| -2.0312092 | HSF4    | heat shock transcription factor 4                                                                                        | NM_001040667    | Hs.512156 |
| -2.6773822 | LTBP2   | latent transforming growth factor beta binding protein 2<br>solute carrier family 7 (cationic amino acid transporter, y+ | NM_000428       | Hs.512776 |
| 2.3902106  | SLC7A7  | system), member 7                                                                                                        | NM_003982       | Hs.513147 |
| 2.5240853  | ADCY7   | adenylate cyclase 7                                                                                                      | NM_001114       | Hs.513578 |
| 4.2687535  | GBP5    | guanylate binding protein 5                                                                                              | NM_052942       | Hs.513726 |
| -3.7327626 | AES     | amino-terminal enhancer of split                                                                                         | NM_198969       | Hs.515053 |
| 4.735391   | SLAMF7  | SLAM family member 7<br>myxovirus (influenza virus) resistance 1, interferon-inducible                                   | NM_021181       | Hs.517265 |
| 3.4338503  | MX1     | protein p78 (mouse)<br>ras-related C3 botulinum toxin substrate 2 (rho family, small GTP                                 | NM_002462       | Hs.517307 |
| 2.645191   | RAC2    | binding protein Rac2)                                                                                                    | NM_002872       | Hs.517601 |
| -2.0917835 | ALS2CL  | ALS2 C-terminal like                                                                                                     | NM_147129       | Hs.517937 |
| 3.513663   | CSTA    | cystatin A (stefin A)                                                                                                    | NM_005213       | Hs.518198 |
| 5.160546   | LAMP3   | lysosomal-associated membrane protein 3<br>transcription factor AP-2 alpha (activating enhancer binding                  | NM_014398       | Hs.518448 |
| -2.298854  | TFAP2A  | protein 2 alpha)                                                                                                         | NM_001032280    | Hs.519880 |
| 2.1978228  | MARCKS  | myristoylated alanine-rich protein kinase C substrate                                                                    | NM_002356       | Hs.519909 |
| 2.5649226  | HLA-F   | major histocompatibility complex, class I, F                                                                             | NM_018950       | Hs.519972 |
| 2.3644736  | FGL2    | fibrinogen-like 2                                                                                                        | NM_006682       | Hs.520989 |
| 2.2877867  | GMFG    | glia maturation factor, gamma                                                                                            | NM_004877       | Hs.5210   |
| 3.8804975  | IRF5    | interferon regulatory factor 5                                                                                           | NM_002200       | Hs.521181 |
| -2.0371425 | BRD3    | bromodomain containing 3                                                                                                 | NM_007371       | Hs.522472 |
| -3.2369454 | EMD     | emerin (Emery-Dreifuss muscular dystrophy)                                                                               | NM_000117       | Hs.522823 |
| 2.0577805  | TMEM50A | transmembrane protein 50A                                                                                                | NM_014313       | Hs.523054 |
| -2.8880277 | TNNI2   | troponin I type 2 (skeletal, fast)                                                                                       | NM_003282       | Hs.523403 |
| 2.7307575  | ZNF215  | zinc finger protein 215                                                                                                  | NM_013250       | Hs.523457 |



|            |          |                                                                                                                       |                 |           |
|------------|----------|-----------------------------------------------------------------------------------------------------------------------|-----------------|-----------|
| 2.6965168  | CD2      | CD2 molecule                                                                                                          | NM_001767       | Hs.523500 |
| 2.2234516  | SLAMF1   | signaling lymphocytic activation molecule family member 1                                                             | NM_003037       | Hs.523660 |
| 2.0995855  | MS4A6A   | membrane-spanning 4-domains, subfamily A, member 6A                                                                   | NM_022349       | Hs.523702 |
| -2.151628  | GPD1     | glycerol-3-phosphate dehydrogenase 1 (soluble)                                                                        | NM_005276       | Hs.524418 |
| -2.084177  | FTH1     | Homo sapiens placenta immunoregulatory factor PLIF mRNA, complete cds. [AY033611]                                     | AY033611        | Hs.524910 |
| -3.0497062 | DLST     | dihydrolipoamide S-succinyltransferase (E2 component of 2-oxo-glutarate complex)                                      | NM_001933       | Hs.525459 |
| -2.035166  | TESC     | tescalcin                                                                                                             | NM_017899       | Hs.525709 |
| 4.481644   |          | Homo sapiens isolate donor Z clone Z1K immunoglobulin kappa light chain variable region mRNA, partial cds. [AF103555] | ENST00000327926 | Hs.525894 |
| -2.5328994 | NXN      | nucleoredoxin                                                                                                         | NM_022463       | Hs.527989 |
| 2.2648697  | C5orf39  | chromosome 5 open reading frame 39                                                                                    | NM_001014279    | Hs.529385 |
| -2.190236  | TNKS1BP1 | tankyrase 1 binding protein 1, 182kDa                                                                                 | NM_033396       | Hs.530730 |
| -2.1593    | COPS7A   | COP9 constitutive photomorphogenic homolog subunit 7A (Arabidopsis)                                                   | NM_016319       | Hs.530823 |
| 3.5084932  | LGALS2   | lectin, galactoside-binding, soluble, 2                                                                               | NM_006498       | Hs.531776 |
| 2.3239577  | ARHGAP25 | Rho GTPase activating protein 25                                                                                      | NM_001007231    | Hs.531807 |
| 4.1460752  | IFI27    | interferon, alpha-inducible protein 27                                                                                | NM_005532       | Hs.532634 |
| -2.3671978 | MOS      | v-mos Moloney murine sarcoma viral oncogene homolog                                                                   | NM_005372       | Hs.533432 |
| -2.5353484 | METR1    | meteorin, glial cell differentiation regulator                                                                        | NM_024042       | Hs.533772 |
| -2.0867493 | FOXL1    | forkhead box L1                                                                                                       | NM_005250       | Hs.533830 |
| -2.3545465 | FLJ20254 | hypothetical protein FLJ20254                                                                                         | NM_017727       | Hs.533934 |
| 4.256319   | HLA-DRB1 | Human lymphocyte antigen (DRw8) mRNA. [M27126]                                                                        | M27126          | Hs.534322 |
| 2.499785   | CASP10   | caspase 10, apoptosis-related cysteine peptidase                                                                      | NM_032977       | Hs.5353   |
| -2.551467  | ASRGL1   | asparaginase like 1                                                                                                   | NM_001083926    | Hs.535326 |
| -3.1454012 | TRAK1    | trafficking protein, kinesin binding 1                                                                                | NM_014965       | Hs.535711 |
| 2.9306176  | CCR5     | chemokine (C-C motif) receptor 5                                                                                      | NM_000579       | Hs.536735 |
| -2.5239525 | SLC6A8   | solute carrier family 6 (neurotransmitter transporter, creatine), member 8                                            | NM_005629       | Hs.540696 |
| 2.0259292  | LEF1     | lymphoid enhancer-binding factor 1                                                                                    | NM_016269       | Hs.555947 |

|            |           |                                                                                                                                                          |                 |           |
|------------|-----------|----------------------------------------------------------------------------------------------------------------------------------------------------------|-----------------|-----------|
| -2.6584685 | PRPS1     | phosphoribosyl pyrophosphate synthetase 1<br>LOC541471 protein (Hypothetical protein MGC4677).<br>[Source:Uniprot/SPTREMBL;Acc:Q96C48]                   | NM_002764       | Hs.56     |
| 2.6371717  | LOC541471 | [ENST00000308604]                                                                                                                                        | ENST00000308604 | Hs.560805 |
| 2.0433033  | EBF1      | early B-cell factor 1                                                                                                                                    | NM_024007       | Hs.573143 |
| 2.0387409  | SLC44A1   | solute carrier family 44, member 1                                                                                                                       | NM_080546       | Hs.573495 |
| 3.0753303  | IL4I1     | interleukin 4 induced 1                                                                                                                                  | NM_172374       | Hs.574492 |
| 2.3504794  | TRIM14    | tripartite motif-containing 14                                                                                                                           | NM_014788       | Hs.575631 |
| -8.82304   | CAMK2N2   | calcium/calmodulin-dependent protein kinase II inhibitor 2<br>neutrophil cytosolic factor 2 (65kDa, chronic granulomatous<br>disease, autosomal 2)       | NM_033259       | Hs.585003 |
| 2.071909   | NCF2      |                                                                                                                                                          | NM_000433       | Hs.587558 |
| 2.062414   | ADRB2     | adrenergic, beta-2-, receptor, surface                                                                                                                   | NM_000024       | Hs.591251 |
| 2.7542553  | OBFC2A    | oligonucleotide/oligosaccharide-binding fold containing 2A                                                                                               | NM_001031716    | Hs.591610 |
| 4.0934777  | CXCR4     | chemokine (C-X-C motif) receptor 4                                                                                                                       | NM_001008540    | Hs.593413 |
| 2.2137291  | DERL3     | Der1-like domain family, member 3                                                                                                                        | NM_198440       | Hs.593679 |
| 2.5763988  |           |                                                                                                                                                          | CR621698        | Hs.613981 |
| -2.162722  | CLN3      | ceroid-lipofuscinosis, neuronal 3, juvenile (Batten, Spielmeyer-<br>Vogt disease)                                                                        | NM_001042432    | Hs.628393 |
| -2.7705197 | ND3       | NADH dehydrogenase, subunit 3 (complex I)                                                                                                                | ENST00000361227 | Hs.631492 |
| -2.7486696 |           |                                                                                                                                                          | AK097322        | Hs.631498 |
| -2.0683858 | PPP1R14A  | protein phosphatase 1, regulatory (inhibitor) subunit 14A<br>leukocyte immunoglobulin-like receptor, subfamily B (with TM<br>and ITIM domains), member 3 | NM_033256       | Hs.631569 |
| 2.1414769  | LILRB3    |                                                                                                                                                          | NM_006864       | Hs.631592 |
| 2.1812851  | HSH2D     | hematopoietic SH2 domain containing                                                                                                                      | NM_032855       | Hs.631617 |
| 2.338555   | WDR92     | WD repeat domain 92<br>UDP-Gal:betaGlcNAc beta 1,4- galactosyltransferase,                                                                               | NM_138458       | Hs.631877 |
| -2.733556  | B4GALT2   | polypeptide 2<br>Homo sapiens artemin (ARTN), transcript variant 2, mRNA                                                                                 | NM_003780       | Hs.632403 |
| -5.3163924 | ARTN      | [NM_057091]                                                                                                                                              | NM_057091       | Hs.632404 |
| -2.080081  | LOC646048 |                                                                                                                                                          | XR_019608       | Hs.633875 |
| 2.4842255  |           |                                                                                                                                                          | BU567832        | Hs.634599 |

|            |           |                                                  |                 |           |
|------------|-----------|--------------------------------------------------|-----------------|-----------|
| 4.1112876  | IGHV1-69  |                                                  | ENST00000390610 | Hs.634941 |
| -2.510136  | RSAP10    |                                                  | XR_019235       | Hs.646743 |
| -2.6653945 | CLDN3     | claudin 3                                        | NM_001306       | Hs.647023 |
| 2.1905713  | GIMAP6    | GTPase, IMAP family member 6                     | NM_024711       | Hs.647105 |
| 2.7215238  | RPL39L    | ribosomal protein L39-like                       | NM_052969       | Hs.647900 |
| -2.2327504 | LOC729983 | hypothetical LOC729983                           | XM_001718065    | Hs.648133 |
| 2.0995002  | LOC399491 | LOC399491 protein                                | AK023376        | Hs.648395 |
| 4.8870206  | KIAA0125  | KIAA0125                                         | D50915          | Hs.649259 |
| -33.334114 | SMR3B     | submaxillary gland androgen regulated protein 3B | NM_006685       | Hs.650650 |
| 2.2196145  |           |                                                  | CR594732        | Hs.651214 |
| 2.8088734  | C2orf59   | chromosome 2 open reading frame 59               | BC010491        | Hs.652166 |
| 2.1598983  | IL15      | interleukin 15                                   | NM_172174       | Hs.654378 |
| -2.2359962 | SDS       | serine dehydratase                               | NM_006843       | Hs.654416 |
| -2.3512797 | CTSD      | cathepsin D                                      | NM_001909       | Hs.654447 |
| 2.77424    | HCP5      | HLA complex P5                                   | L06175          | Hs.654480 |
| 3.8316476  | TRBV5-4   | T cell receptor beta variable 5-4                | BC028083        | Hs.654496 |
| 3.257101   | PTPRC     | protein tyrosine phosphatase, receptor type, C   | NM_002838       | Hs.654514 |
| 3.8254662  | POU2AF1   | POU class 2 associating factor 1                 | NM_006235       | Hs.654525 |
| -2.9505026 | CST4      |                                                  | NM_001899.2     | Hs.654549 |
| 2.8484266  | PSMB9     |                                                  | NM_002800.4     | Hs.654585 |
| 2.2702696  | RHOH      | ras homolog gene family, member H                | NM_004310       | Hs.654594 |
| 2.107414   | CENTB2    | centaurin, beta 2                                | NM_012287       | Hs.654597 |
| -2.1061077 | LPHN1     | latrophilin 1                                    | NM_001008701    | Hs.654658 |
| -2.1456833 | FBXO34    | F-box protein 34                                 | AF531436        | Hs.654725 |
| -2.2038486 | MXD4      | MAX dimerization protein 4                       | NM_006454       | Hs.655020 |
| 2.337359   | HLA-H     |                                                  | CR594843        | Hs.655226 |
| -2.3874922 | ASPHD1    | aspartate beta-hydroxylase domain containing 1   | NM_181718       | Hs.655761 |
| 2.7530174  | SAMD9     | sterile alpha motif domain containing 9          | NM_017654       | Hs.65641  |
| 3.62766    | CPNE5     | copine V                                         | NM_020939       | Hs.657869 |
| -2.9748783 | GIPR      | gastric inhibitory polypeptide receptor          | NM_000164       | Hs.658534 |
| 3.847994   | KLHL6     | kelch-like 6 (Drosophila)                        | NM_130446       | Hs.659147 |

|            |           |                                                                     |                 |           |
|------------|-----------|---------------------------------------------------------------------|-----------------|-----------|
| 2.3282022  | APOBEC3G  | apolipoprotein B mRNA editing enzyme, catalytic polypeptide-like 3G | AK022802        | Hs.660143 |
| -4.0095434 | EXOSC6    | exosome component 6                                                 | ENST00000288063 | Hs.660633 |
| 2.0486982  | ZMYM2     | zinc finger, MYM-type 2                                             | AL136621        | Hs.665654 |
| 2.8319097  | MGC16025  | hypothetical protein MGC16025                                       | BC008026        | Hs.676121 |
| 2.0606396  |           |                                                                     | AV739664        | Hs.686885 |
| 2.1821806  | TPST2     | tyrosylprotein sulfotransferase 2                                   | NM_001008566    | Hs.694819 |
| 2.2964718  | RAB11FIP1 | RAB11 family interacting protein 1 (class I)                        | NM_001002233    | Hs.696035 |
| 2.35901    | LOC647121 | embigin homolog (mouse) pseudogene                                  | NR_003955       | Hs.697682 |
| 2.1541605  | MEF2C     | myocyte enhancer factor 2C                                          | NM_002397       | Hs.699175 |
| 2.7457678  | TP53INP1  | tumor protein p53 inducible nuclear protein 1                       | NM_033285       | Hs.700624 |
| 2.0368733  | CIITA     | class II, major histocompatibility complex, transactivator          | NM_000246       | Hs.701991 |
| 2.0579395  | SMNDC1    | survival motor neuron domain containing 1                           | NM_005871       | Hs.702187 |
| -2.3616695 | ND1       | NADH dehydrogenase, subunit 1 (complex I)                           | ENST00000361390 | Hs.703252 |
| 2.2643847  | CRIP1     | cysteine-rich protein 1 (intestinal)                                | NM_001311       | Hs.70327  |
|            |           | Homo sapiens cDNA FLJ32509 fis, clone SMINT1000054. [AK057071]      | AK057071        | Hs.703561 |
| -2.076841  |           |                                                                     | NM_001017956    | Hs.708008 |
| -2.033887  | OS9       | amplified in osteosarcoma                                           | NM_139266       | Hs.708051 |
| 2.8032143  | STAT1     | signal transducer and activator of transcription 1, 91kDa           | NR_003491       | Hs.708982 |
| 2.753984   | MIAT      | myocardial infarction associated transcript (non-protein coding)    | BC032451        | Hs.709180 |
| 5.9116526  | IGK@      | immunoglobulin kappa locus                                          | BC034142        | Hs.709180 |
| 4.49886    | IGKV1-5   | immunoglobulin kappa variable 1-5                                   | AJ399872        | Hs.709180 |
| 4.29846    | HLA-C     |                                                                     | NM_000442       | Hs.709189 |
| 2.1736076  | PECAM1    | platelet/endothelial cell adhesion molecule (CD31 antigen)          | NM_000565       | Hs.709210 |
| 2.509133   | IL6R      | interleukin 6 receptor                                              | NM_004048       | Hs.709313 |
| 3.744024   | B2M       | beta-2-microglobulin                                                |                 |           |
|            |           | CTD (carboxy-terminal domain, RNA polymerase II, polypeptide        |                 |           |
| -2.090688  | CTDSP1    | A) small phosphatase 1                                              | NM_182642       | Hs.709352 |
| -2.0357769 | GCS1      | glucosidase I                                                       | NM_006302       | Hs.709420 |
| 2.0056639  | ABCA6     | ATP-binding cassette, sub-family A (ABC1), member 6                 | NM_080284       | Hs.709514 |
| 2.3516557  | CATSPER2  | cation channel, sperm associated 2                                  | NM_172097       | Hs.710334 |

|            |              |                                                                                         |              |           |
|------------|--------------|-----------------------------------------------------------------------------------------|--------------|-----------|
| -2.0392127 | LOC100133315 | similar to hCG1640299                                                                   | AK131288     | Hs.710569 |
| -2.1786997 | C1orf152     | chromosome 1 open reading frame 152                                                     | NR_003242    | Hs.711472 |
| 2.69929    | TRA@         | T cell receptor alpha locus                                                             | BC063385     | Hs.74647  |
| 4.120243   | RGS1         | regulator of G-protein signaling 1                                                      | NM_002922    | Hs.75256  |
| 2.465136   | SLA          | Src-like-adaptor                                                                        | NM_001045556 | Hs.75367  |
| 2.4377854  | CCL4         | chemokine (C-C motif) ligand 4                                                          | NM_002984    | Hs.75703  |
| 3.5013306  | HLA-B        | major histocompatibility complex, class I, B                                            | NM_005514    | Hs.77961  |
| 2.1979165  | AKR1C3       | aldo-keto reductase family 1, member C3 (3-alpha hydroxysteroid dehydrogenase, type II) | NM_003739    | Hs.78183  |
| 2.636453   | NFIL3        | nuclear factor, interleukin 3 regulated                                                 | NM_005384    | Hs.79334  |
| 2.5572054  | GADD45A      | growth arrest and DNA-damage-inducible, alpha                                           | NM_001924    | Hs.80409  |
| 2.1593578  | PIM1         | pim-1 oncogene                                                                          | NM_002648    | Hs.81170  |
| 3.3694217  | IFI44        | interferon-induced protein 44                                                           | NM_006417    | Hs.82316  |
| 2.1167622  | CRYZ         | crystallin, zeta (quinone reductase)                                                    | NM_001889    | Hs.83114  |
| 2.3918307  | CD8A         | CD8a molecule                                                                           | NM_001768    | Hs.85258  |
| 3.2372684  | PNOC         | prepronociceptin                                                                        | NM_006228    | Hs.88218  |
| 2.0215206  | GPR68        | G protein-coupled receptor 68                                                           | NM_003485    | Hs.8882   |
| 2.5579872  | ALOX5        | arachidonate 5-lipoxygenase                                                             | NM_000698    | Hs.89499  |
| 2.0920136  | C1QB         | complement component 1, q subcomponent, B chain                                         | NM_000491    | Hs.8986   |
| -2.1744065 | NPM3         | nucleophosmin/nucleoplasmin, 3                                                          | NM_006993    | Hs.90691  |
| 4.366175   | GZMA         | granzyme A (granzyme 1, cytotoxic T-lymphocyte-associated serine esterase 3)            | NM_006144    | Hs.90708  |
| -3.092122  | TBKBP1       | TBK1 binding protein 1                                                                  | NM_014726    | Hs.94790  |
| -2.1850517 | HNRNPA0      | heterogeneous nuclear ribonucleoprotein A0                                              | NM_006805    | Hs.96996  |
| 2.0300803  |              | AV702101 ADB Homo sapiens cDNA clone ADBCGB06 5', mRNA sequence [AV702101]              | AV702101     | Hs.97579  |
| 2.1013496  | IL23A        | interleukin 23, alpha subunit p19                                                       | NM_016584    | Hs.98309  |
| 2.3446662  | RAB31        | RAB31, member RAS oncogene family                                                       | NM_006868    | Hs.99528  |
