# Supplementary material
Source: PubMed Central journal article supplement (PMC4527329)
Supplement: NIHMS524591-supplement-SupplTable3.pdf [file NIHMS524591-supplement-SupplTable3.pdf]

**Supplemental Table 3 Cytokine and chemokine production in the SG of AAV5-BMP6 and AAV5-GFP treated mice (pg/ml)**

|        | <b>IFN-<math>\gamma</math></b> | <b>IL-10</b> | <b>IL-1<math>\beta</math></b> | <b>IL-4</b> | <b>TNF-<math>\alpha</math></b> | <b>IL-13</b> | <b>IL-5</b> | <b>IL-6</b> | <b>KC</b> | <b>JE</b> | <b>MCP-1</b> |
|--------|--------------------------------|--------------|-------------------------------|-------------|--------------------------------|--------------|-------------|-------------|-----------|-----------|--------------|
| GFP    | 110.30                         | 60.29        | 87.28                         | 16.72       | 30.88                          | 4.96         | 11.60       | 10.33       | 65.52     | 29.01     | 48.28        |
| BMP6   | 61.17                          | 40.70        | 90.12                         | 8.59        | 17.50                          | 4.81         | 0.94        | 21.32       | 38.49     | 37.62     | 60.48        |
| t-test | 0.43                           | 0.26         | 0.77                          | 0.06        | 0.25                           | 0.97         | 0.15        | 0.60        | 0.33      | 0.39      | 0.54         |

  

|        | <b>MIP-<math>\beta</math></b> | <b>MMP9</b> | <b>IL-12p70</b> | <b>IL-17</b> | <b>IL-18</b> | <b>IL-2</b> | <b>IL-12p40</b> | <b>IL-23</b> | <b>L-selectin</b> | <b>RANTES</b> | <b>TGF-<math>\beta</math>1</b> |
|--------|-------------------------------|-------------|-----------------|--------------|--------------|-------------|-----------------|--------------|-------------------|---------------|--------------------------------|
| GFP    | 31.39                         | 2149.29     | 8.60            | 5.64         | 117.68       | 19.91       | 1.10            | 1909.78      | 16753.17          | 125.69        | 1202.59                        |
| BMP6   | 49.24                         | 943.62      | 6.98            | 6.82         | 91.74        | 14.67       | 1.92            | 1276.68      | 18326.00          | 174.15        | 1096.96                        |
| t-test | 0.17                          | 0.25        | 0.56            | 0.70         | 0.25         | 0.39        | 0.18            | 0.61         | 0.77              | 0.42          | 0.81                           |

Mast cell proteinase-1(MCP-1), MCP-5, macrophage inflammatory protein-1 beta (MIP-1 $\beta$ ), regulated upon activation, normal T Cell expressed and secreted (RANTES), matrix metalloproteinase-9 (MMP-9), interleukin-1 beta (IL-1 $\beta$ ), IL-4, IL-5, IL-6, IL-10, IL-12p40, IL-12p70, IL-13, IL-17, IL-18, IL-23, interferon- $\gamma$  (IFN- $\gamma$ ), and transforming growth factor- $\beta$ 1 (TGF- $\beta$ 1) were measured using a multiplex sandwich-ELISA assay (Aushon Biosystem Billerica, MA, USA).

NA: Lower than detection limits for this assay: IL-4: 1.2 pg/ml, IL-5: 2.3 pg/ml, IL-6: 5.5 pg/ml, IL-10: 1.6 pg/ml, IL-12p70: 0.78 pg/ml, IL-17: 1.6 pg/ml, MCP-1: 0.78 pg/ml, TGF- $\beta$ 1: 6.8 pg/ml, IFN- $\gamma$ : 7.8 pg/ml, TNF- $\alpha$ : 3.1 pg/ml. 5.5 pg/ml, IL-10: 1.6 pg/ml, IL-12p70: 0.78 pg/ml, IL-17: 1.6 pg/ml, MCP-1: 0.78 pg/ml, TGF- $\beta$ 1: 6.8 pg/ml, IFN- $\gamma$ : 7.8 pg/ml, TNF- $\alpha$ : 3.1 pg/ml.

The data shown are the mean of each group of mice [AAV5-GFP (N=3) and AAV5-BMP6 (N=3)]. Unpaired student t-test was used for statistical analysis. No statistical significant difference was detected in cytokine production between AAV5-GFP and BMP6 groups.
